# Supplementary material for: A reversible B–A transition of DNA duplexes induced by synthetic cationic copolymers
Source: Royal Society of Chemistry journal article supplement (doi:10.1039/c6cc02237e), 2016-01-01
Supplement: c6cc02237e1.pdf [file c6cc02237e1.pdf]

Supplementary Material (ESI) for Chemical Communications

This journal is (c) The Royal Society of Chemistry 2016

## **A reversible B-A transition of DNA duplexes induced by synthetic cationic copolymers**

Nonoka Yamaguchi,<sup>a</sup> Yu-ki Zouzumi,<sup>a</sup> Naohiko Shimada,<sup>b</sup> Shu-ichi Nakano,<sup>a</sup> Naoki Sugimoto,<sup>a,c</sup>

Atsushi Maruyama,<sup>\*b</sup> Daisuke Miyoshi,<sup>\*a</sup>

<sup>a</sup> Faculty of Frontiers of Innovative Research in Science and Technology (FIRST), Konan University,  
7-1-20 Minatojima-minamimachi, Chuo-ku, Kobe 650-0047, Japan.

<sup>b</sup> Department of Biomolecular Engineering, Graduate School of Bioscience and Biotechnology, Tokyo  
Institute of Technology, 4259 Nagatsuta, Midori-ku, Yokohama 226-8501, Japan.

<sup>c</sup> Frontier Institute for Biomolecular Engineering Research (FIBER), Konan University, 7-1-20  
Minatojima-minamimachi, Chuo-ku, Kobe 650-0047, Japan.

### Contents

Page 2. Supplemental Figure S1: UV spectra and different UV spectra of GC8

Page 3. Supplemental Figure S2: Melting and annealing curves of GC0

Page 4. Supplemental Figure S3: Melting and annealing curves of GC8

Page 5. Supplemental Figure S4: Melting curves of GC2, GC4, GC5, GC6, and GC8

Page 6. Supplemental Figure S5: Non-denaturing polyacrylamide gel of GC8

Page 7. Supplemental Table S1: Thermodynamic parameters of GC8

Page 8: Materials and Methods

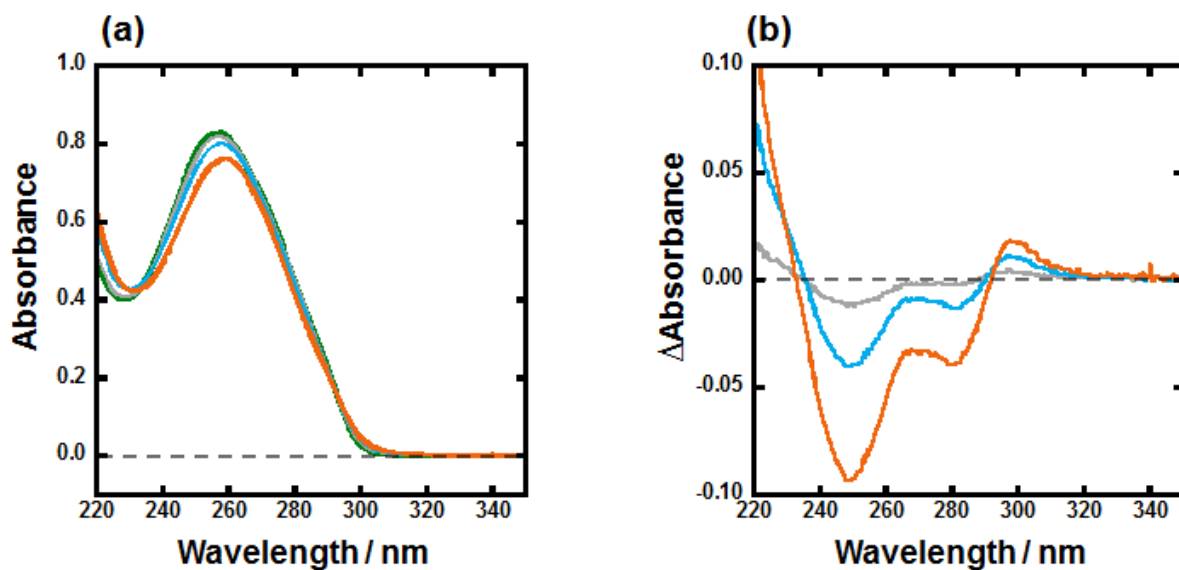

**Figure S1.** (a) UV spectra of 5  $\mu$ M GC8 in the presence of PAA-g-Dex of various concentrations [N/P = 0 (green), 0.3 (gray), 1.0 (blue), 3.0 (yellow)] in the buffer of 100 mM NaCl, 10 mM  $\text{Na}_2\text{HPO}_4$  (pH7.0), and 1 mM  $\text{Na}_2\text{EDTA}$  at 25°C. (b) UV difference spectra of 5  $\mu$ M GC8, obtained by subtraction of the spectrum in the absence of PAA-g-Dex from the spectra in the presence of PAA-g-Dex [N/P = 0.3 (gray), 1.0 (blue), 3.0 (yellow)].

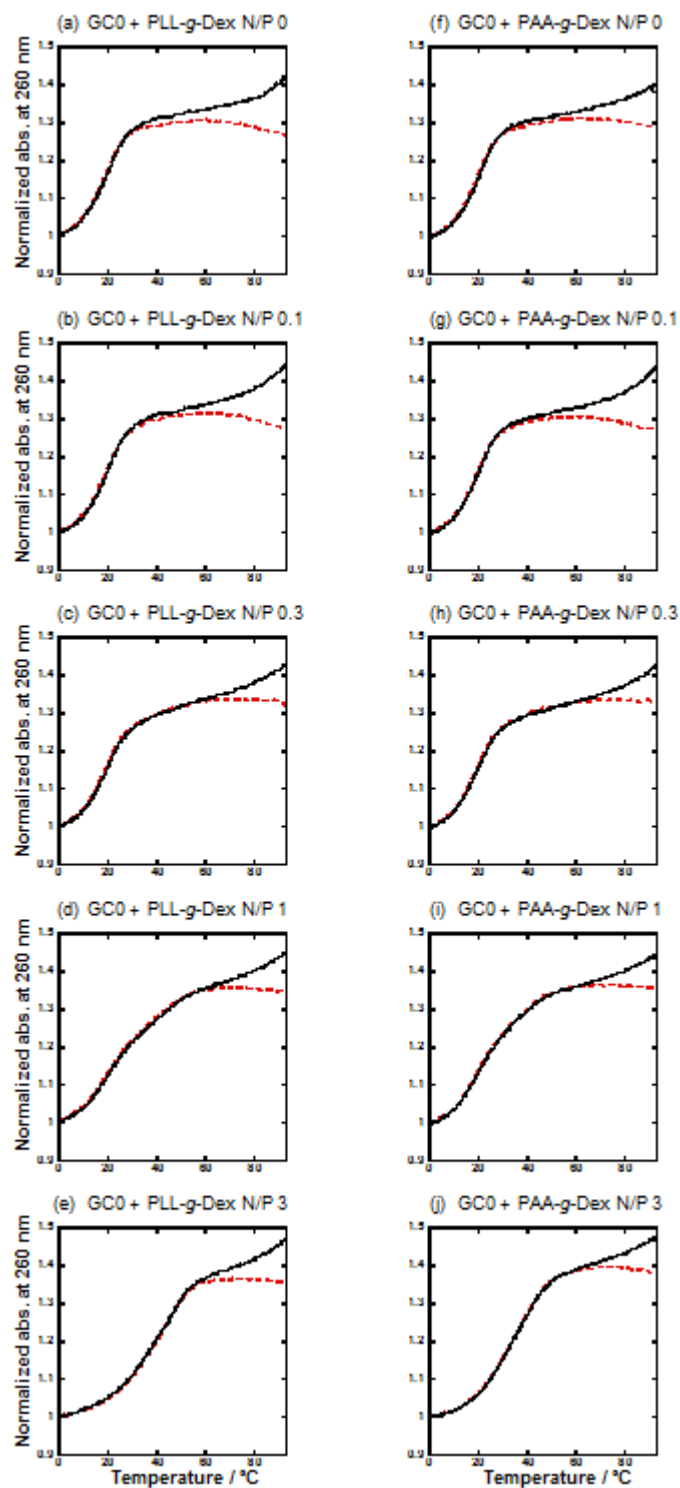

**Figure S2.** Melting and annealing curves of 20  $\mu\text{M}$  GC0 in the presence of PLL-g-Dex (a: N/P = 0), (b: N/P = 0.1), (c: N/P = 0.3), (d: N/P = 1.0), (e: N/P = 3.0) or in the presence of PAA-g-Dex (f: N/P = 0), (g: N/P = 0.1), (h: N/P = 0.3), (i: N/P = 1.0), (j: N/P = 3.0) in the buffer of 100 mM NaCl, 10 mM  $\text{Na}_2\text{HPO}_4$  (pH7.0), and 1 mM  $\text{Na}_2\text{EDTA}$ .

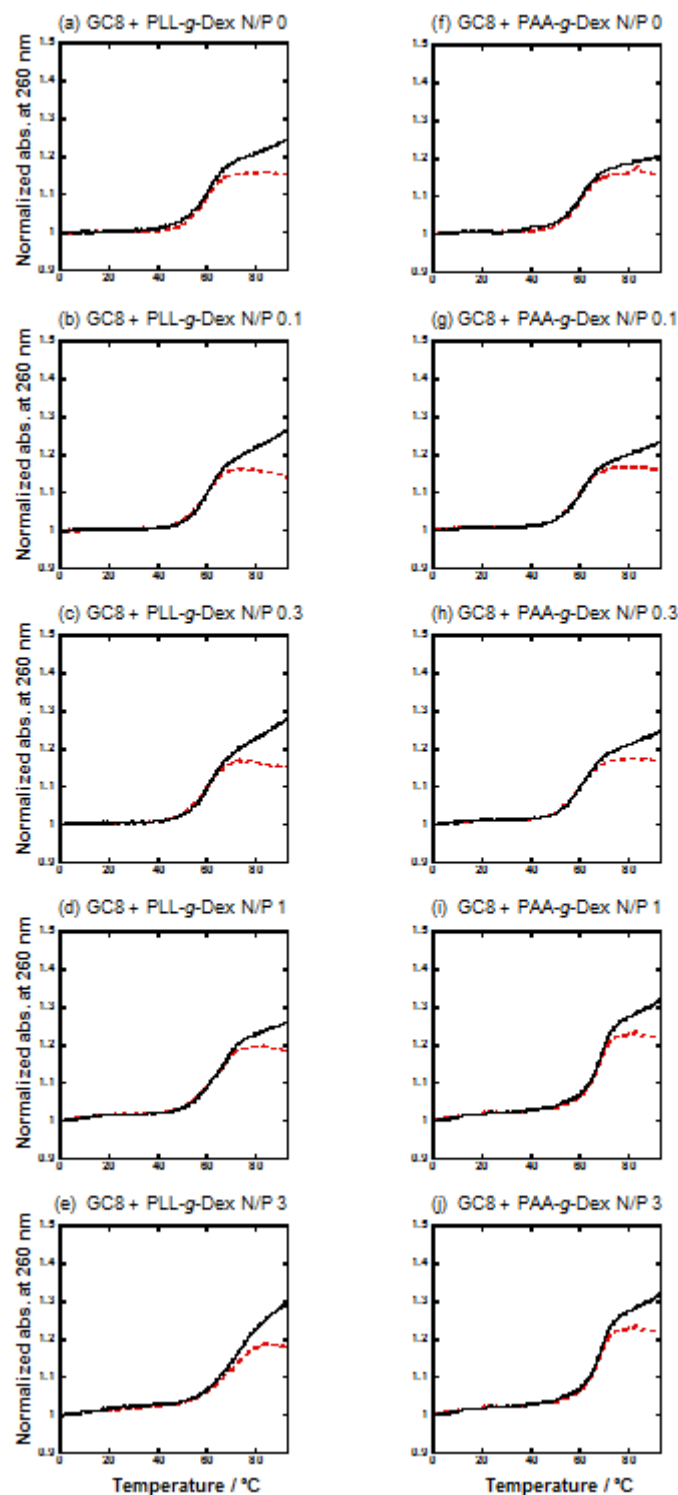

**Figure S3.** Melting and annealing curves of 20  $\mu\text{M}$  GC8 in the presence of PLL-g-Dex (a: N/P = 0), (b: N/P = 0.1), (c: N/P = 0.3), (d: N/P = 1.0), (e: N/P = 3.0) or in the presence of PAA-g-Dex (f: N/P = 0), (g: N/P = 0.1), (h: N/P = 0.3), (i: N/P = 1.0), (j: N/P = 3.0) in the buffer of 100 mM NaCl, 10 mM  $\text{Na}_2\text{HPO}_4$  (pH7.0), and 1 mM  $\text{Na}_2\text{EDTA}$ .

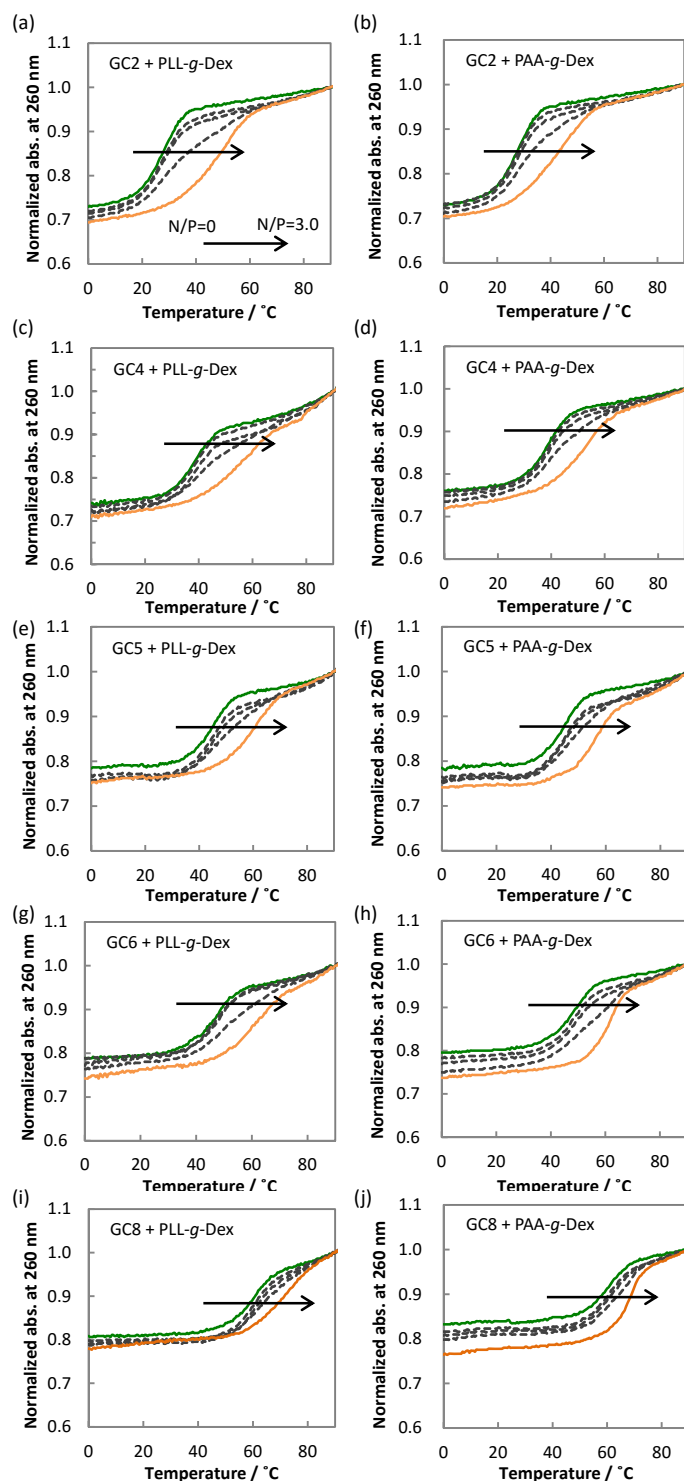

**Figure S4.** Normalized melting curves of 20  $\mu\text{M}$  DNA duplexes in the presence of PLL-g-Dex (left column) or PAA-g-Dex (right column) of various concentrations [ $N/P = 0$  (green), 0.1, 0.3, 1.0, 3.0 (yellow)] in the buffer of 100 mM NaCl, 10 mM  $\text{Na}_2\text{HPO}_4$  (pH7.0) and 1 mM  $\text{Na}_2\text{EDTA}$ . (a)(b) GC2, (c)(d) GC4, (e)(f) GC5, (g)(h) GC6, (i)(j) GC8.

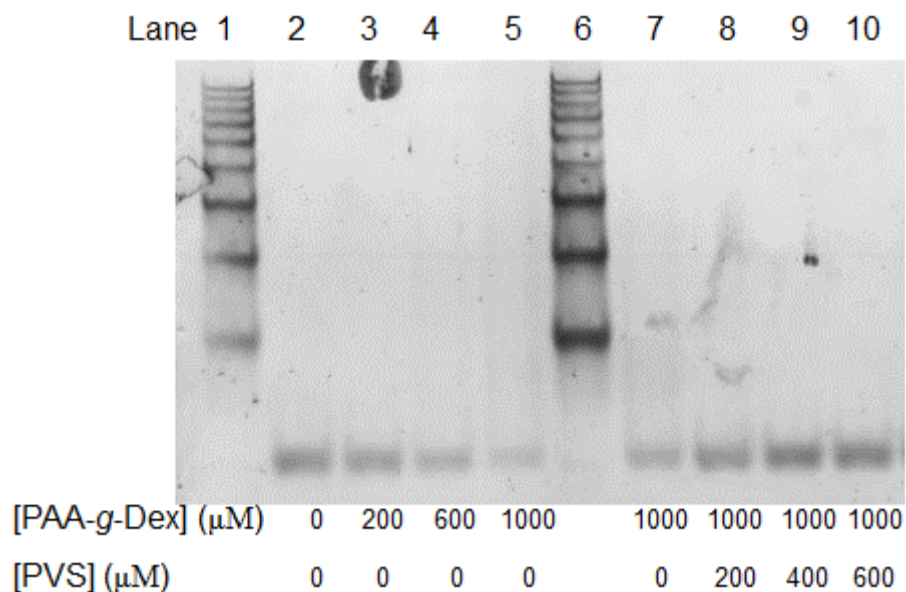

**Figure S5.** Non-denaturing 10% polyacrylamide gel electrophoresis of 10  $\mu$ M GC8 in the presence of PAA-g-Dex and PVS. All experiments were carried out in the buffer of 100 mM NaCl, 10 mM  $\text{Na}_2\text{HPO}_4$  (pH7.0), and 1 mM  $\text{Na}_2\text{EDTA}$  at 4°C. Lanes 1 and 6, DNA ladder including 100, 90, 80, 70, 60, 50, 40, 30, 20 base pairs duplexes; Lane 2, [PAA-g-Dex] = 0  $\mu$ M [PVS] = 0  $\mu$ M; Lane 3, [PAA-g-Dex] = 200  $\mu$ M [PVS] = 0  $\mu$ M; Lane 4, [PAA-g-Dex] = 600  $\mu$ M [PVS] = 0  $\mu$ M; Lane 5, [PAA-g-Dex] = 1000  $\mu$ M [PVS] = 0  $\mu$ M; Lane 7, [PAA-g-Dex] = 1000  $\mu$ M [PVS] = 0  $\mu$ M; Lane 8, [PAA-g-Dex] = 1000  $\mu$ M [PVS] = 200  $\mu$ M; Lane 9, [PAA-g-Dex] = 1000  $\mu$ M [PVS] = 400  $\mu$ M; Lane 10, [PAA-g-Dex] = 1000  $\mu$ M [PVS] = 600  $\mu$ M.

**Table S1.** Thermodynamic parameters for formation of DNA duplex of GC8 in the absence of polymer, in the presence of PAA-g-Dex (N/P = 3.0), and in the presence of PAA-g-Dex (N/P = 3.0) and PVS (1200  $\mu$ M sulfonate) in the buffer of 100 mM NaCl 10 mM Na<sub>2</sub>HPO<sub>4</sub> (pH7.0), and 1 mM Na<sub>2</sub>EDTA.

|                  | $\Delta G^{\circ}_{25}$<br>(kcal mol <sup>-1</sup> ) | $\Delta H^{\circ}$<br>(kcal mol <sup>-1</sup> ) | $T\Delta S^{\circ}$<br>(kcal mol <sup>-1</sup> ) | $T_m$<br>(°C) |
|------------------|------------------------------------------------------|-------------------------------------------------|--------------------------------------------------|---------------|
| Without          | -14.7                                                | -75.2                                           | -60.5                                            | 57.8          |
| +PAA-g-Dex       | -21.9                                                | -117                                            | -95.0                                            | 67.6          |
| +PAA-g-Dex + PVS | -15.4                                                | -81.4                                           | -66.0                                            | 58.2          |

## Materials and Methods

### Materials

The PLL-g-Dex copolymer ( $M_n$  of PLL = 14400,  $M_n$  of Dex = 5300, degree of substitution of Dex = 14.4%, weight fraction of Dex = 86%) and PAA-g-Dex ( $M_n$  of PAA = 15000,  $M_n$  of Dex = 5300, degree of substitution of Dex = 11.4 %, weight fraction of Dex = 92%) were prepared by a reductive amination reaction between poly(L-lysine) and dextran, as described in detail previously (1,2). PVS (poly(vinyl sulfonate)) was purchased from Sigma-Aldrich.

DNA oligonucleotides were HPLC grade and were purchased from Hokkaido System Science (Sapporo, Japan) and and Sigma-Aldrich Japan K.K. (Tokyo, Japan). The single-strand concentrations of the DNA oligodeoxynucleotides were determined by measuring the absorbance at 260 nm and high temperature using a UV-1800 spectrometer (Shimadzu Co., Ltd., Kyoto, Japan) connected to a Shimadzu TMSPC-8 thermoprogrammer. Single-strand extinction coefficients were calculated from mononucleotide and dinucleotide data using the nearest-neighbor approximation (3).

All chemical reagents were of reagent grade from Wako Pure Chemical Co., Ltd. (Osaka, Japan) and Sigma-Aldrich Japan K.K. And the chemical reagents were used without further purification.

### Circular dichroism measurements

Circular Dichroism (CD) spectra of DNA oligonucleotides were measured for 20  $\mu$ M DNA total strand concentration using a J-820 spectropolarimeter (JASCO Co., Ltd., Hachioji, Japan) with a 0.1-cm path length quartz cell at 25°C. The CD spectrum was obtained by taking the average of three scans made at 0.2-nm intervals from 200 to 350 nm. Before measurement, the DNA samples were heated at 90°C for 3 min, gently cooled at 0.5°C min<sup>-1</sup>, and incubated at 25°C. The temperature of the cell holder was regulated by a PTC-348 temperature controller (JASCO), and the cuvette-holding chamber was flushed with a constant stream of dry N<sub>2</sub> gas to avoid water condensation on the cuvette exterior. Before the measurement, the sample was heated to 90°C, gently cooled at a rate of 0.5 °C min<sup>-1</sup>, and incubated at 25°C for 1 h.

### Thermal and thermodynamic analysis

The UV melting curves of DNA oligonucleotides were measured by a Shimadzu 1800 spectrophotometer (Shimadzu) equipped with the Shimadzu TMSPC-8 temperature controller. The UV melting curves were measured at 260 nm where DNA duplexes show a hyperchromic transition (4). All experiments were carried out in the buffer of 100 mM NaCl, 10 mM Na<sub>2</sub>HPO<sub>4</sub> (pH7.0) and 1 mM Na<sub>2</sub>EDTA. The heating rate was 0.5°C min<sup>-1</sup>. The thermodynamic parameters were calculated from the fit of the melting curves (with at least five different concentrations of DNA oligonucleotides) to a theoretical equation for an intramolecular association as described previously (5,6). Before the measurement, the sample was heated to 90°C, gently cooled at a rate of 0.5°C min<sup>-1</sup> for annealing, and incubated at 0°C for 1 h.

### Non-denaturing gel electrophoresis

Gel electrophoresis was performed on non-denaturing gels containing 10% polyacrylamide. Ice-cold loading buffer (980  $\mu\text{L}$ ) was mixed with 20  $\mu\text{L}$  of 10  $\mu\text{M}$  GC8, and a 5  $\mu\text{L}$  aliquot of the mixed solution was loaded and analyzed by electrophoresis at 10 V  $\text{cm}^{-1}$  for 3 h at 4°C. All experiments were carried out in the buffer of 100 mM NaCl, 10 mM  $\text{Na}_2\text{HPO}_4$  (pH7.0) and 1 mM  $\text{Na}_2\text{EDTA}$  at 4°C. Gels were stained by using SYBR® Gold (Molecular Probes) and imaged with FLA-5100 (Fuji Film Co., Ltd., Tokyo, Japan). Before the measurement, the sample was heated to 90 °C, gently cooled at a rate of 0.5 °C  $\text{min}^{-1}$ , and incubated at 4 °C for 1 h.

### References

1. A. Maruyama, M. Katoh, T. Ishihara, T. Akaike, *Bioconjugate Chem.* **1997**, 8, 3-6.
2. Y. Sato, Y. Kobayashi, T. Kamiya, H. Watanabe, T. Akaike, K. Yoshikawa, A. Maruyama, *Biomaterials*, **2005**, 26, 703-711.
3. Richard, E. G. Handbook of Biochemistry and Molecular Biology; CRC Press: Cleveland, OH, **1975**.
4. J.-L. Mergny, L. Lacroix, *Oligonucleotides* **2003**, 13, 515-537.
5. L. A. Marky, K. J. Breslauer, *Biopolymers* **1987**, 26, 1601-1620.
6. D. Miyoshi, H. Karimata, N. Sugimoto, *J. Am. Chem. Soc.* **2006**, 128, 7957-7963.
